# Supplementary material for: Reduced mitochondrial respiration in T cells of patients with major depressive disorder
Source: PubMed Central journal article supplement (PMC8571492; doi:10.1016/j.isci.2021.103312), 2021-10-16
Supplement: mmc1.pdf [file mmc1.pdf]

## **Supplemental information**

### **Reduced mitochondrial respiration in T cells of patients with major depressive disorder**

**Stefanie Gamradt, Helge Hasselmann, Aline Taenzer, Jelena Brasanac, Victoria Stiglbauer, Arne Sattler, Max Sajitz-Hermstein, Sylwia Kierszniowska, Caren Ramien, Jan Nowacki, Lea Mascarell-Maricic, Katja Wingefeld, Dominique Piber, Andreas Ströhle, Katja Kotsch, Friedemann Paul, Christian Otte, and Stefan M. Gold**

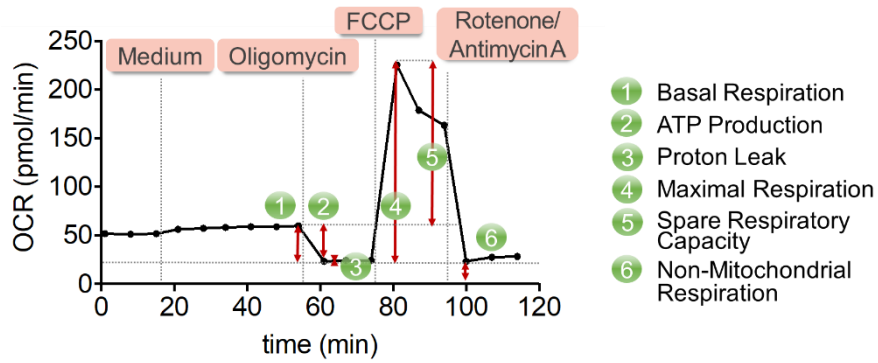

**Figure S1 | Key parameters of mitochondrial respiration derived from oxygen consumption rate (OCR) measurements using Seahorse XF Cell Mito Stress Test (Related to Figure 2, Figure S2 and STAR Methods).** In order to quantify mitochondrial respiration, the following modulators of respiration were added sequentially to the cells and the OCR was determined over time in a Seahorse XFe96 Analyzer: Oligomycin as ATP synthase inhibitor, carbonyl cyanide-4(trifluoromethoxy) phenylhydrazine (FCCP) as uncoupling agent and Rotenone/Antimycin A as complex I/III inhibitors. At the beginning of the assay fresh Seahorse medium was added.

*Calculations:*

**Basal Respiration** = Last rate measurement before addition of Oligomycin – Non-Mitochondrial Respiration

**ATP Production** = Last rate measurement before Oligomycin injection – Minimum rate measurement after Oligomycin injection

**Proton Leak** = Minimum rate measurement after Oligomycin injection – Non-Mitochondrial Respiration

**Maximal Respiration** = Maximum rate measurement after FCCP injection – Non-Mitochondrial Respiration

**Spare Respiratory Capacity** = Maximal Respiration – Basal Respiration

**Non-mitochondrial Respiration** = Minimum rate measurement after Rotenone/ Antimycin A injection

**Coupling Efficiency (%)** = ATP Production / Basal Respiration x 100 (values >100% were interpreted as 100%)

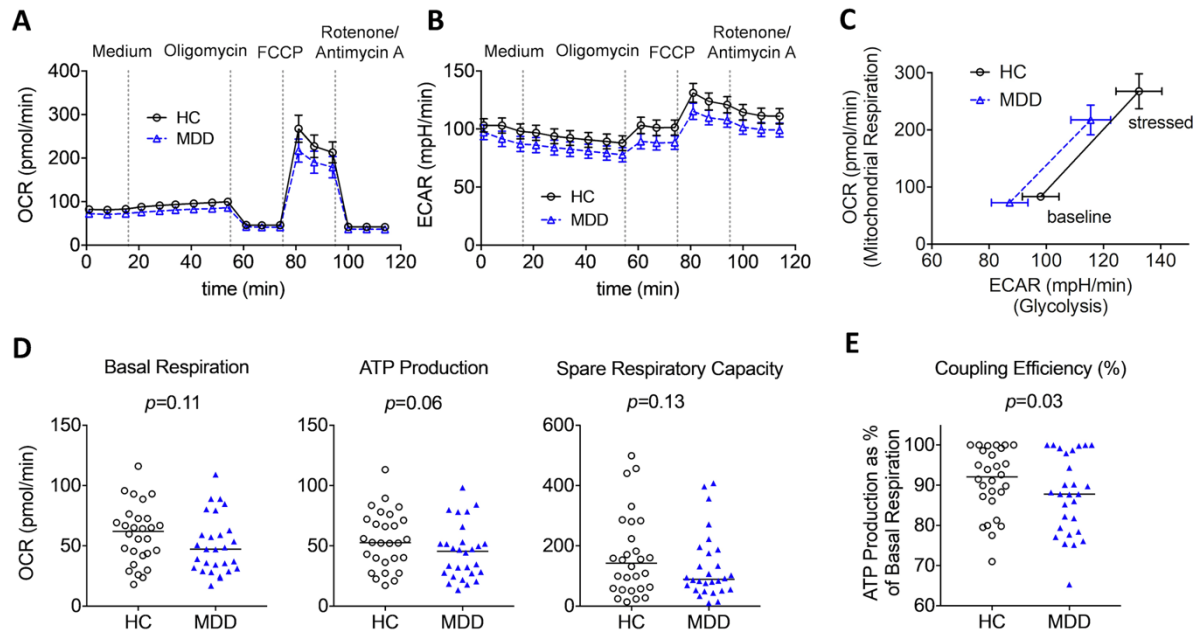

**Figure S2 | Immunometabolic profiling of monocytes from MDD patients (Related to Figure 2).**

In order to quantify mitochondrial respiration as well as glycolytic activity of CD14<sup>+</sup> monocytes from 28 MDD patients and matched healthy controls (HC), different modulators of respiration were added sequentially to the cells and the oxygen consumption rate (OCR) as well as the extracellular acidification rate (ECAR) were determined over time in a Seahorse XFe96 Analyzer (mean  $\pm$  SEM is shown, all assays run in three to five replicates for each subject<sup>1</sup>) (A, B). OCR and ECAR values under baseline and stressed conditions (= after addition of Oligomycin and FCCP) were plotted against each other to visualize the energy phenotype of the cells; mean  $\pm$  SEM is shown (C). The main parameters of mitochondrial respiration (basal respiration, ATP production and spare respiratory capacity) as well as the coupling efficiency expressed as the % of basal respiration coupled to ATP production are shown (D, E). See also **Figure S1** for further information regarding the calculation of these parameters from OCR measurements. Data are presented as individual data and group median. All cells were freshly isolated on the day of the patient visit, then cryopreserved and defrosted on the day of experiment. Wilcoxon signed-rank test was used to compare groups. Oligomycin: ATP synthase inhibitor; carbonyl cyanide-4(trifluoromethoxy) phenylhydrazine (FCCP): uncoupling agent; Rotenone/Antimycin A: complex I/III inhibitors. Individual patient data for the readouts presented here are provided in the supplementary data file, **Data S1**.

<sup>1</sup> Assay run in duplicates for subjects BHC22, BHC119, BHC120, BMDD2, BMDD8 and BMDD11

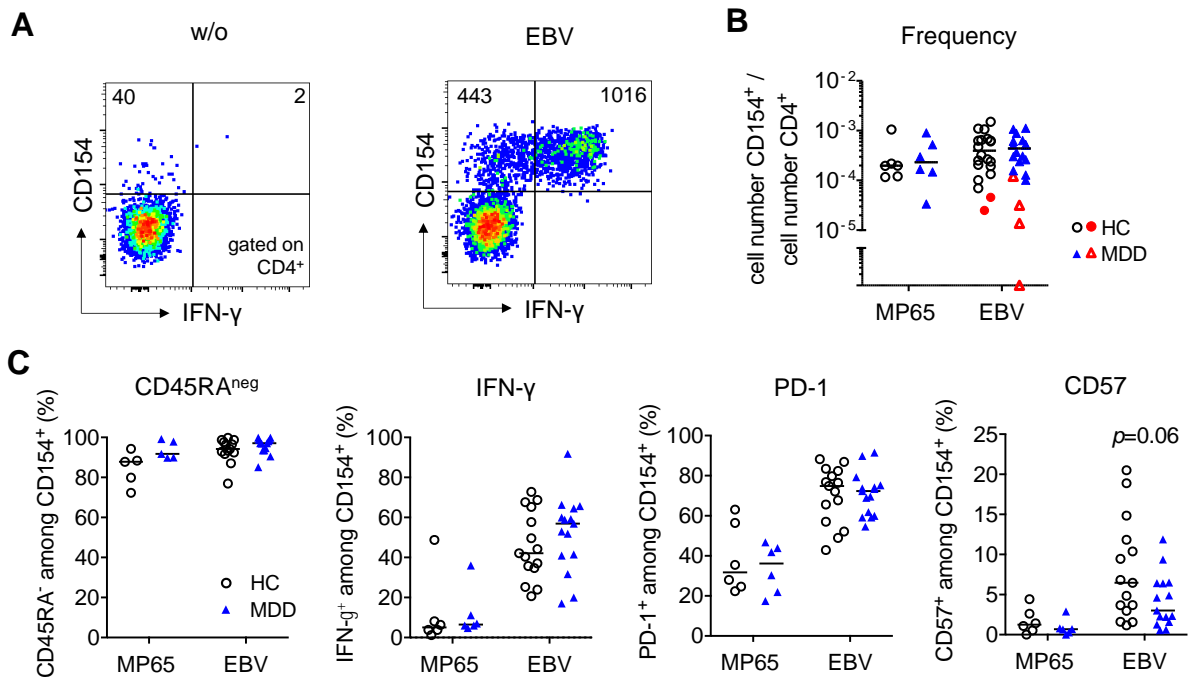

**Figure S3 | Characterization of EBV-specific T cells in MDD patients (Related to Figure 3).**

Cryopreserved and thawed PBMCs from MDD patients and matched healthy controls (HC) were stimulated with a pool of EBV antigens (EBNA-1, LMP2a, BZLF; n=20 pairs), the control antigen MP65 (n=6 pairs) from *C. albicans* or left unstimulated for 7 h. Samples were then magnetically enriched for antigen-activated CD154<sup>+</sup> T cells and analyzed by flow cytometry. Exemplary dot plots of a non-stimulated and an EBV-stimulated sample from a HC are shown, numbers indicating absolute cell counts after enrichment from 10<sup>7</sup> PBMCs (A). Relative frequencies of EBV-reactive T cells in MDD patients and HC (B). Red filled circles (HC) or open triangles (MDD) indicate EBV-negative individuals which could be clearly identified by high CD45RA expression and low expression of IFN- $\gamma$  (not shown). Expression levels of CD45RA, IFN- $\gamma$ , PD-1 and CD57 in EBV-specific T cells of MDD patients and HC are shown (C). Individual patient data and median are shown. Wilcoxon signed-rank test was used to compare groups. All p-values > 0.1 if not otherwise indicated.

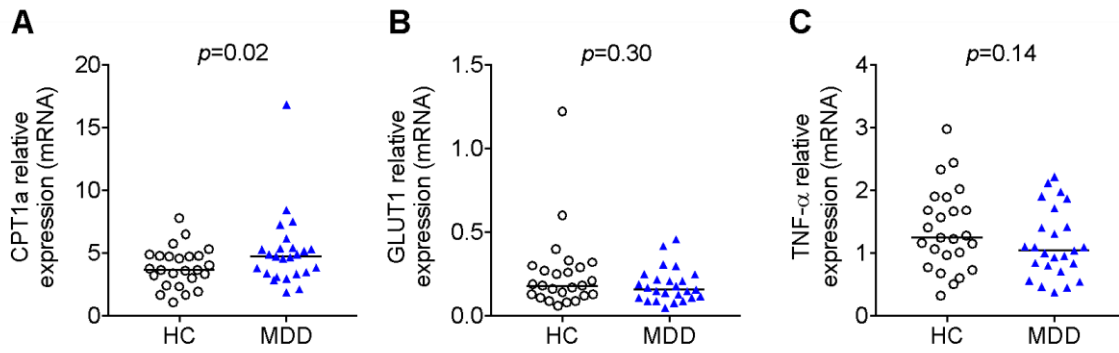

**Figure S4 | Expression of key regulator genes of cellular metabolism in monocytes of MDD patients (Related to Figure 4).** mRNA expression levels of *CPT1a* (A), *SLC2A1* (encoding GLUT1) (B) and *TNF* (C) in  $CD14^+$  monocytes of MDD patients ( $n=25$ ) compared to matched controls (HC,  $n=25$ ). Gene expression is shown as fold change relative to housekeeping genes (*TBP* and *IPO8*). Individual patient data and median are shown. Wilcoxon signed-rank test was used to compare groups.

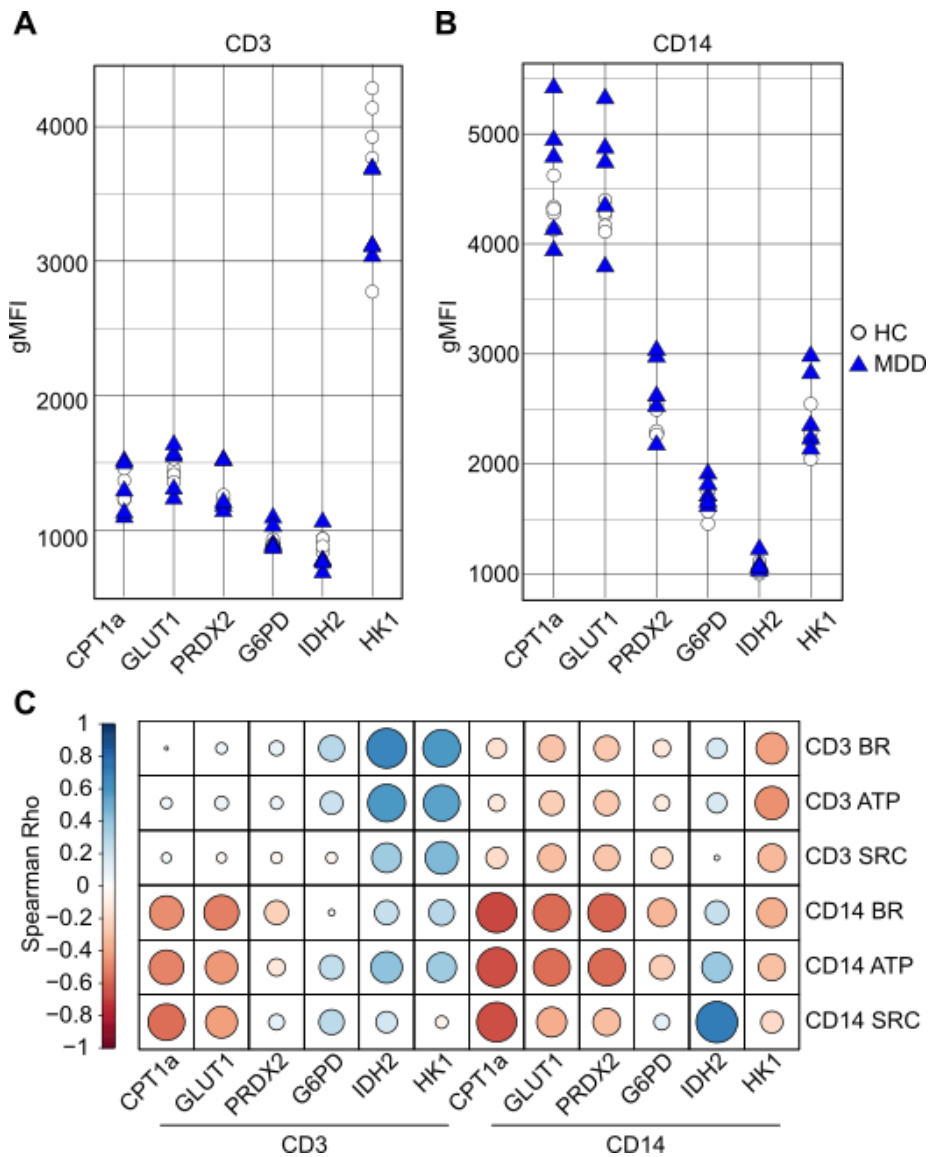

**Figure S5 | Flow cytometry-based metabolic analysis of T cells and monocytes of MDD patients (n=5) and healthy controls (HC, n=5) (Related to Figure 2 & 4 and Figure S2 & S4).** Geometric mean fluorescence intensities (gMFI) of CPT1a, G6PD, GLUT1, HK1, IDH2 and PRDX2 are shown for CD3<sup>+</sup> T cells (A) and CD14<sup>+</sup> monocytes (B). Correlation analyses of Met-Flow readouts of CD3<sup>+</sup> and CD14<sup>+</sup> cells with Seahorse assay readouts of T cells and monocytes (C). Circle sizes indicate magnitude of correlation, the color shading additionally depicts the direction of correlation (Spearman's rho, see legend). CPT1a: Carnitine Palmitoyltransferase 1 A; G6PD: Glucose-6-phosphate-dehydrogenase; GLUT1: Glucose transporter 1; HK1: Hexokinase 1; IDH2: Isocitrate dehydrogenase 2; PRDX2: Peroxiredoxin 2; BR: Basal respiration; ATP: ATP production; SRC: Spare respiratory capacity.

**Table S1 | Antibody Panels (Related to STAR Methods).**

|                                    | <b>Target / Fluorochrome</b>         | <b>Clone</b>          | <b>Company</b>  |
|------------------------------------|--------------------------------------|-----------------------|-----------------|
| <b>Naive/ Memory<br/>T cells</b>   | CD3 Brilliant Violet 421             | OKT3                  | Biolegend       |
|                                    | CD8 Brilliant Violet 510             | SK1                   | Biolegend       |
|                                    | HLA-DR FITC                          | LN3                   | Biolegend       |
|                                    | CCR7 PE                              | G043H7                | Biolegend       |
|                                    | CD4 PerCP Cy5.5                      | RPA-T4                | Biolegend       |
|                                    | CD45RA PE Cy7                        | HI100                 | Biolegend       |
|                                    | CD38 APC                             | HB-7                  | Biolegend       |
|                                    | Zombie NIR (live/dead)               |                       | Biolegend       |
| <b>T cell subsets/<br/>CCR</b>     | CD3 Brilliant Violet 421             | OKT3                  | Biolegend       |
|                                    | CD8 Brilliant Violet 510             | SK1                   | Biolegend       |
|                                    | HLA-DR FITC                          | LN3                   | Biolegend       |
|                                    | CXCR3 PE                             | G025H7                | Biolegend       |
|                                    | CD4 PerCP Cy5.5                      | RPA-T4                | Biolegend       |
|                                    | CCR6 PE Cy7                          | G034E3                | Biolegend       |
|                                    | CCR4 APC                             | L291H4                | Biolegend       |
|                                    | Zombie NIR (live/dead)               |                       | Biolegend       |
| <b>Tregs</b>                       | FoxP3 Brilliant Violet 421           | 206D                  | Biolegend       |
|                                    | CD3 Brilliant Violet 510             | SK7                   | Biolegend       |
|                                    | HLA-DR FITC                          | LN3                   | Biolegend       |
|                                    | CD25 PE                              | M-A251                | Biolegend       |
|                                    | CD4 PerCP Cy5.5                      | RPA-T4                | Biolegend       |
|                                    | CD45 RA PE Cy7                       | HI100                 | Biolegend       |
|                                    | CD127 APC                            | A019D5                | Biolegend       |
|                                    | Zombie NIR (live/dead)               |                       | Biolegend       |
| <b>CD154 enriched<br/>fraction</b> | CXCR5 Brilliant Violet 421           | J252D4                | Biolegend       |
|                                    | CD8/CD20/ CD14 VioGreen              | BW135/80 /REA780/Tük4 | Miltenyi Biotec |
|                                    | Live/Dead Aqua                       |                       | Thermo Fisher   |
|                                    | <i>CD154 FITC<sup>a</sup></i>        | 5C8                   | Miltenyi Biotec |
|                                    | PD-1 PE                              | EH12.2H7              | Biolegend       |
|                                    | <i>IFN-γ PerCP-Cy5.5<sup>a</sup></i> | 4S.B3                 | Biolegend       |
|                                    | CD45RA PE/Cy7                        | HI100                 | Biolegend       |
|                                    | CD57 APC                             | HNK-1                 | Biolegend       |
|                                    | CD4 APCVio770                        | VIT4                  | Miltenyi Biotec |

|                                                    |                               |                       |                         |
|----------------------------------------------------|-------------------------------|-----------------------|-------------------------|
| <b>Senescence / exhaustion (original fraction)</b> | CXCR5 Brilliant Violet 421    | J252D4                | Biologend               |
|                                                    | CD8/CD20/ CD14 VioGreen       | BW135/80 /REA780/Tük4 | Miltenyi Biotec         |
|                                                    | Live/Dead Aqua                |                       | Thermo Fisher           |
|                                                    | CPT1a AF488 or Isotype        | 8F6AE9/7E10G10        | abcam                   |
|                                                    | PD-1 PE                       | EH12.2H7              | Biologend               |
|                                                    | CD4 PerCP-Cy5.5               | RPA-T4                | Biologend               |
|                                                    | CD45RA PE/Cy7                 | HI100                 | Biologend               |
|                                                    | CD57 APC                      | HNK-1                 | Biologend               |
|                                                    | CD8a APC/Cy7                  | RPA-T8                | Biologend               |
| <b>Inhibitory receptors/KLRG1</b>                  | Tim-3 Brilliant Violet 421    | F38-2E2               | Biologend               |
|                                                    | CD14/CD20 VioGreen            | Tük4/REA780           | Miltenyi Biotec         |
|                                                    | Live/Dead Aqua                |                       | Thermo Fisher           |
|                                                    | LAG-3 FITC                    | 11C3C65               | Biologend               |
|                                                    | KLRG1 PE                      | SA231A2               | Biologend               |
|                                                    | CD4 PerCP-Cy5.5               | RPA-T4                | Biologend               |
|                                                    | CD45RA PE/Cy7                 | HI100                 | Biologend               |
|                                                    | CTLA-4 APC                    | BNI3                  | Biologend               |
|                                                    | CD8 APC/Cy7                   | RPA-T8                | Biologend               |
| <b>Met-Flow</b>                                    | IDH2 PE/Cy7 <sup>b</sup>      | EPR7577               | abcam                   |
|                                                    | HK1 AF647 <sup>b</sup>        | EPR10134(B)           | abcam                   |
|                                                    | G6PD PerCPCy5.5 <sup>b</sup>  | EPR6292               | abcam                   |
|                                                    | PRDX2 Pe-Atto594 <sup>b</sup> | EPR5154               | abcam                   |
|                                                    | CPT1a AF488                   | 8F6AE9                | abcam                   |
|                                                    | GLUT1 PE                      | EPR3915               | abcam                   |
|                                                    | CD14 BV421                    | HCD14                 | Biologend               |
|                                                    | CD3 Alexa700                  | SK7                   | Biologend               |
|                                                    | CD4 BUV395                    | SK3 (Leu3a)           | BD Biosciences          |
|                                                    | CD8a APC-eFluor780            | SK1                   | ThermoFisher Scientific |
|                                                    | CD19 BV510                    | HIB19                 | Biologend               |
|                                                    | CD56 BV785                    | 5.1H11                | Biologend               |
|                                                    | CD45RO BV650                  | UCHL1                 | Biologend               |
|                                                    | CD62L BV605                   | DREG-56               | Biologend               |
|                                                    | Live/Dead UV                  |                       | Biologend               |

**TABLE S1** | continued

<sup>a</sup>Antibody conjugates in italic were used for intracellular staining.

<sup>b</sup>Antibodies were custom-conjugated according to manufacturer's instructions using abcam Lightning Link conjugation kits.



**Table S2 | List of patients with MDD and healthy controls matched for age, sex, body mass index and current smoking status (Related to Table 1).** Depression severity (MADRS), psychiatric comorbidity as well as depression subtype according to DSM-5 are given where applicable.

|        | Age | Sex | BMI  | Currently Smoking | MADRS Score | Psychiatric Comorbidity | Subtype (DSM-5) |
|--------|-----|-----|------|-------------------|-------------|-------------------------|-----------------|
| MDD017 | 19  | F   | 21.6 | Y                 | 19          | -                       | -               |
| HC065  | 19  | F   | 21.6 | Y                 | 0           |                         |                 |
| MDD026 | 30  | M   | 26.5 | Y                 | 28          | SP                      | melancholic     |
| HC053  | 27  | M   | 25.3 | Y                 | 0           |                         |                 |
| MDD030 | 47  | F   | 19.5 | N                 | 27          | GAD                     | melancholic     |
| HC028  | 42  | F   | 19.0 | N                 | 0           |                         |                 |
| MDD025 | 32  | M   | 24.3 | N                 | 19          | PD                      | melancholic     |
| HC027  | 31  | M   | 27.5 | N                 | 0           |                         |                 |
| MDD013 | 26  | M   | 22.2 | N                 | 21          | -                       | -               |
| HC038  | 28  | M   | 22.2 | N                 | 1           |                         |                 |
| MDD012 | 53  | F   | 27.0 | N                 | 28          | -                       | -               |
| HC026  | 55  | F   | 25.4 | N                 | 1           |                         |                 |
| MDD028 | 24  | F   | 26.1 | Y                 | 25          | -                       | melancholic     |
| HC046  | 30  | F   | 25.8 | Y                 | 1           |                         |                 |
| MDD031 | 26  | M   | 18.3 | Y                 | 32          | -                       | melancholic     |
| HC077  | 23  | M   | 17.7 | Y                 | 5           |                         |                 |
| MDD036 | 24  | F   | 28.7 | N                 | 25          | -                       | melancholic     |
| HC024  | 28  | F   | 26.6 | N                 | 0           |                         |                 |
| MDD023 | 35  | F   | 19.7 | Y                 | 22          | -                       | melancholic     |
| HC045  | 30  | F   | 19.1 | Y                 | 0           |                         |                 |
| MDD029 | 39  | F   | 20.3 | N                 | 28          | -                       | -               |
| HC022  | 41  | F   | 23.1 | N                 | 0           |                         |                 |
| MDD027 | 59  | M   | 25.4 | N                 | 25          | -                       | melancholic     |
| HC050  | 57  | M   | 21.6 | N                 | 0           |                         |                 |
| MDD035 | 18  | F   | 30.4 | N                 | 19          | SP                      | -               |
| HC096  | 21  | F   | 32.1 | N                 | 2           |                         |                 |
| MDD034 | 24  | M   | 25.3 | N                 | 12          | -                       | -               |
| HC097  | 30  | M   | 23.0 | N                 | 0           |                         |                 |

|        | Age | Sex | BMI  | Currently Smoking | MADRS Score | Psychiatric Comorbidity | Subtype (DSM-5) |
|--------|-----|-----|------|-------------------|-------------|-------------------------|-----------------|
| MDD004 | 22  | F   | 21.2 | N                 | 27          | SP                      | -               |
| HC030  | 25  | F   | 19.5 | N                 | 2           |                         |                 |
| MDD011 | 30  | F   | 27.7 | N                 | 28          | PD                      | -               |
| HC033  | 25  | F   | 23.7 | N                 | 2           |                         |                 |
| MDD010 | 50  | F   | 26.7 | N                 | 27          | -                       | melancholic     |
| HC003  | 44  | F   | 28.5 | N                 | 0           |                         |                 |
| MDD005 | 20  | F   | 26.6 | N                 | 30          | -                       | melancholic     |
| HC034  | 24  | F   | 22.2 | N                 | 0           |                         |                 |
| MDD006 | 45  | F   | 22.0 | Y                 | 25          | -                       | melancholic     |
| HC071  | 52  | F   | 22.5 | Y                 | 1           |                         |                 |
| MDD020 | 29  | F   | 21.9 | N                 | 35          | -                       | melancholic     |
| HC106  | 26  | F   | 24.8 | N                 | 5           |                         |                 |
| MDD038 | 25  | F   | 21.0 | N                 | 31          | PTSD                    | atypical        |
| HC093  | 30  | F   | 24.1 | N                 | 0           |                         |                 |
| MDD016 | 36  | M   | 27.3 | N                 | 24          | PD                      | melancholic     |
| HC070  | 32  | M   | 25.7 | N                 | 1           |                         |                 |
| MDD008 | 55  | F   | 32.2 | N                 | 24          | -                       | melancholic     |
| HC119  | 46  | F   | 31.9 | N                 | 0           |                         |                 |
| MDD032 | 27  | F   | 25.3 | Y                 | 31          | SP                      | -               |
| HC120  | 36  | F   | 24.6 | Y                 | 1           |                         |                 |
| MDD002 | 32  | F   | 27.7 | N                 | 26          | PD                      | melancholic     |
| HC029  | 28  | F   | 23.5 | N                 | 1           |                         |                 |
| MDD018 | 33  | F   | 24.4 | N                 | 25          | -                       | melancholic     |
| HC036  | 28  | F   | 22.4 | N                 | 0           |                         |                 |
| MDD039 | 20  | F   | 23.7 | N                 | 13          | -                       | -               |
| HC044  | 21  | F   | 25.1 | N                 | 2           |                         |                 |
| MDD040 | 21  | F   | 22.9 | N                 | 32          | -                       | melancholic     |
| HC004  | 22  | F   | 21.9 | N                 | 1           |                         |                 |

**Table S2** | continued

F: Female; M: Male; Y: Yes; N: No; GAD: generalized anxiety disorder; PD: panic disorder; PTSD: post-traumatic stress disorder; SP: social phobia; MADRS: Montgomery-Asberg Depression Rating Scale; DSM-5: Diagnostic and Statistical Manual of Mental Disorders.
